# Supplementary material for: Transcriptome Analysis Reveals Molecular Mechanisms under Salt Stress in Leaves of Foxtail Millet (Setaria italica L.)
Source: MDPI journal article supplement (doi:10.3390/plants11141864), 2022-07-18
Supplement: s1 [file s1]

**Table S7.** 104 foxtail millet accessions for testing in the study

| Code | Name                           | Origin                           | Status                 |
|------|--------------------------------|----------------------------------|------------------------|
| FM1  | Dong gu No.1                   | Shenyang, Liaoning Province      | Commodity seeds        |
| FM2  | Jin gu No.2                    | Siping, Jilin Province           | Commodity seeds        |
| FM3  | Dong gu No.3                   | Shenyang, Liaoning province      | Commodity seeds        |
| FM4  | Jin gu 21                      | Jinzhong, Shanxi Province        | Commodity seeds        |
| FM5  | Jing dou dun gu No.8           | Beijing                          | Commodity seeds        |
| FM6  | Hong gu 2000                   | Fuxin, Liaoning Province         | Commodity seeds        |
| FM7  | Qin zhou huang gu zi           | Jinzhong, Shanxi Province        | Commodity seeds        |
| FM8  | Huang jin gu zi                | Shenyang, Liaoning province      | Commodity seeds        |
| FM9  | Dun gu                         | Zhangye, Gansu Province          | Commodity seeds        |
| FM10 | Niao bu dan                    | Zhangye, Gansu Province          | Commodity seeds        |
| FM11 | Lü bao gan jin gu              | Jinzhong, Shanxi Province        | Commodity seeds        |
| FM12 | Huang jin wang gu              | Chaoyang, Liaoning Province      | Self-reservation seeds |
| FM13 | Feng hong gu                   | Chifeng, Inner Mongolia Province | Commodity seeds        |
| FM14 | Chi gu No.16                   | Chifeng, Inner Mongolia Province | Commodity seeds        |
| FM15 | Chi gu No.10                   | Chifeng, Inner Mongolia Province | Commodity seeds        |
| FM16 | Liao gu No.4                   | Shenyang, Liaoning province      | Commodity seeds        |
| FM17 | GE07 fu xin                    | Fuxin, Liaoning Province         | Self-reservation seeds |
| FM18 | Liao gu No.2                   | Shenyang, Liaoning province      | Commodity seeds        |
| FM19 | Liao feng gu No.3              | Dandong, Liaoning Province       | Commodity seeds        |
| FM20 | Zhang gu 1501                  | Shenyang, Liaoning province      | Self-reservation seeds |
| FM21 | Ge 1505                        | Fuxin, Liaoning Province         | Self-reservation seeds |
| FM22 | Jing xuan shu xiang zao gan gu | Handan, Hebei Province           | Commodity seeds        |
| FM23 | Hong dun gu                    | Beijing                          | Commodity seeds        |
| FM24 | Jin wa wa                      | Zhengzhou, Henan Province        | Commodity seeds        |
| FM25 | Ji gu No.19                    | Handan, Hebei Province           | Commodity seeds        |
| FM26 | Ji gu No.1860                  | Handan, Hebei Province           | Commodity seeds        |

---

|      |                            |                                  |                        |
|------|----------------------------|----------------------------------|------------------------|
| FM27 | Niao bu diao zhan xiang gu | Hebi City, Henan Province        | Commodity seeds        |
| FM28 | Shu xiang No.1             | Handan, Hebei Province           | Commodity seeds        |
| FM29 | Shu xiang No.2             | Handan, Hebei Province           | Commodity seeds        |
| FM30 | Xiang zhan niao bu zhuo    | Beijing                          | Commodity seeds        |
| FM31 | Te gong hong xiang gu      | Handan, Hebei Province           | Commodity seeds        |
| FM32 | Te han No.1                | Handan, Hebei Province           | Commodity seeds        |
| FM33 | Niao bu chi hong gai gu    | Xinyang, Henan Province          | Commodity seeds        |
| FM34 | Dong chang No.1            | Handan, Hebei Province           | Commodity seeds        |
| FM35 | Dun xiang No.3             | Jinan, Shandong Province         | Commodity seeds        |
| FM36 | Jin gu wang                | Beijing                          | Commodity seeds        |
| FM37 | Huang jin dun gu           | Botou, Hebei Province            | Commodity seeds        |
| FM38 | Dun gu No.1                | Fuyu, Jilin Province             | Commodity seeds        |
| FM39 | Nei meng gu                | Chifeng, Inner Mongolia Province | Self-reservation seeds |
| FM40 | Jin gu No.8                | Baoding, Hebei Province          | Commodity seeds        |
| FM41 | Bo cai bi                  | Dongying, Shandong Province      | Self-reservation seeds |
| FM42 | Hong gu                    | Shenyang, Liaoning province      | Self-reservation seeds |
| FM43 | Qin zhou huang             | Shenyang, Liaoning province      | Commodity seeds        |
| FM44 | Chai jian                  | Jinan, Shandong Province         | Self-reservation seeds |
| FM45 | Ji gu No.19                | Jinan, Shandong Province         | Commodity seeds        |
| FM46 | Ji gu No.20                | Jinan, Shandong Province         | Commodity seeds        |
| FM47 | Ji you jin gu fu er        | Beijing                          | Commodity seeds        |
| FM48 | Jing xuan dun gu yi hao    | Cangzhou, Hebei Province         | Commodity seeds        |
| FM49 | Zhang lan jun1 liu zhong   | Dongying, Shandong Province      | Self-reservation seeds |
| FM50 | Yu shi qin liu zhong       | Dongying, Shandong Province      | Self-reservation seeds |
| FM51 | Jin gu No.54               | Luliang, Shanxi Province         | Commodity seeds        |
| FM52 | Jin fen No.106             | Yan'an, Shanxi Province          | Commodity seeds        |
| FM53 | Jin gu No.57               | Luliang, Shanxi Province         | Commodity seeds        |
| FM54 | Jin gu No.40               | Luliang, Shanxi Province         | Commodity seeds        |

---

|      |                           |                               |                        |
|------|---------------------------|-------------------------------|------------------------|
| FM55 | Fen xuan No.3             | Luliang, Shanxi Province      | Commodity seeds        |
| FM56 | Jin zhen zhu              | Luliang, Shanxi Province      | Commodity seeds        |
| FM57 | Jin gu No.29              | Luliang, Shanxi Province      | Commodity seeds        |
| FM58 | Jin fen No.2              | Yan'an, Shanxi Province       | Commodity seeds        |
| FM59 | Fen te No.11              | Luliang, Shanxi Province      | Commodity seeds        |
| FM60 | T6                        | Lianyungang, Jiangsu Province | Self-reservation seeds |
| FM61 | T7                        | Linyi, Shandong Province      | Self-reservation seeds |
| FM62 | T3                        | Linyi, Shandong Province      | Self-reservation seeds |
| FM63 | T2                        | Linyi, Shandong Province      | Self-reservation seeds |
| FM64 | Hong xiang zhuang yuan    | Linyi, Shandong Province      | Self-reservation seeds |
| FM65 | T5                        | Linyi, Shandong Province      | Self-reservation seeds |
| FM66 | T9                        | Linyi, Shandong Province      | Self-reservation seeds |
| FM67 | T10                       | Linyi, Shandong Province      | Self-reservation seeds |
| FM68 | Huang jin gong gu         | Linyi, Shandong Province      | Self-reservation seeds |
| FM69 | T8                        | Linyi, Shandong Province      | Self-reservation seeds |
| FM70 | Ma zhuang liu             | Tai'an, Shandong Province     | Commodity seeds        |
| FM71 | Ji gu No.16               | Jining, Shandong Province     | Self-reservation seeds |
| FM72 | Xiao zao gu               | Beijing                       | Commodity seeds        |
| FM73 | Liu yi gu                 | Beijing                       | Commodity seeds        |
| FM74 | Bai ba zi                 | Beijing                       | Commodity seeds        |
| FM75 | Cha dian gu               | Tianjin                       | Commodity seeds        |
| FM76 | Mao mao gu                | Tianjin                       | Commodity seeds        |
| FM77 | Dan shen han gu           | Tianjin                       | Commodity seeds        |
| FM78 | Da mao gu                 | Hebei Baoji                   | Commodity seeds        |
| FM79 | Qian chuan jin gu         | Langfang, Hebei Province      | Commodity seeds        |
| FM80 | Sheng tou jin             | Langfang, Hebei Province      | Commodity seeds        |
| FM81 | Qi tou bai yang wei ba gu | Langfang, Hebei Province      | Commodity seeds        |
| FM82 | Qi tou ding gu zi         | Binzhou, Shandong Province    | Commodity seeds        |

---

|       |                      |                                      |                 |
|-------|----------------------|--------------------------------------|-----------------|
| FM83  | Jin de               | America                              | Commodity seeds |
| FM84  | Bai fan gu           | Xianyang, Shaanxi Province           | Commodity seeds |
| FM85  | Dao ba qi            | Beijing                              | Commodity seeds |
| FM86  | Xiao huang gu        | Beijing                              | Commodity seeds |
| FM87  | Ga ga qing           | Beijing                              | Commodity seeds |
| FM88  | Bai gu san           | Beijing                              | Commodity seeds |
| FM89  | Hong gen gu zi       | Beijing                              | Commodity seeds |
| FM90  | Pu huang yu          | Beijing                              | Commodity seeds |
| FM91  | Zhu wei ba xi        | Beijing                              | Commodity seeds |
| FM92  | Wan ping bai gu      | Beijing                              | Commodity seeds |
| FM93  | Tong zhou zhong      | Beijing                              | Commodity seeds |
| FM94  | San bian se          | Beijing                              | Commodity seeds |
| FM95  | Yan xia gu 1hao      | Yan'an, Shaanxi Province             | Commodity seeds |
| FM96  | Zhu xi No.13         | Zhangjiakou, Hebei Province          | Commodity seeds |
| FM97  | Jin dian huang       | Zhangjiakou, Hebei Province          | Commodity seeds |
| FM98  | Xiao huang gu        | Daxing'anling, Heilongjiang Province | Commodity seeds |
| FM99  | Er huang gu          | Hohhot, Inner Mongolia Province      | Commodity seeds |
| FM100 | Zhang nong No.1      | Zhangjiakou, Hebei Province          | Commodity seeds |
| FM101 | Cheng nong No.2      | Zhangjiakou, Hebei Province          | Commodity seeds |
| FM102 | Huang miao da hua pi | Beijing                              | Commodity seeds |
| FM103 | Mo li gu             | Beijing                              | Commodity seeds |
| FM104 | Lan gu No.3          | Zibo, Shandong Province              | Commodity seeds |

---
