# Supplementary material for: Transcriptome Analysis Reveals Molecular Mechanisms under Salt Stress in Leaves of Foxtail Millet (Setaria italica L.)
Source: MDPI journal article supplement (doi:10.3390/plants11141864), 2022-07-18
Supplement: s1 [file s1]

**Table S6.** Sequencing statistics of RNA libraries.

| Sample | Reads No. | Bases (Gp) | Q20 (%) | Q30 (%) | Clean Reads No. | Clean Data (Gp) | Clean Reads (%) | Clean Data (%) | Total Mapped rate (%) | Uniquely Mapped rate (%) |
|--------|-----------|------------|---------|---------|-----------------|-----------------|-----------------|----------------|-----------------------|--------------------------|
| SS1    | 43275738  | 6.53       | 97.64   | 94.15   | 43051268        | 6.48            | 99.48           | 99.19          | 91.79                 | 95.14                    |
| SS2    | 44032306  | 6.65       | 97.39   | 93.54   | 43798096        | 6.60            | 99.46           | 99.20          | 90.17                 | 95.96                    |
| SS3    | 46559864  | 7.03       | 97.63   | 94.12   | 46311302        | 6.97            | 99.46           | 99.18          | 92.19                 | 94.42                    |
| TS1    | 52169882  | 7.88       | 97.62   | 94.14   | 51892368        | 7.81            | 99.46           | 99.18          | 91.81                 | 95.46                    |
| TS2    | 40160758  | 6.06       | 97.63   | 94.12   | 39956892        | 6.02            | 99.49           | 99.19          | 91.14                 | 95.31                    |
| TS3    | 45878970  | 6.93       | 97.62   | 94.08   | 45648738        | 6.87            | 99.49           | 99.22          | 93.27                 | 93.88                    |
| SC1    | 50118866  | 7.57       | 97.72   | 94.29   | 49886262        | 7.51            | 99.53           | 99.26          | 92.76                 | 96.06                    |
| SC2    | 40694258  | 6.14       | 97.73   | 94.33   | 40503578        | 6.10            | 99.53           | 99.27          | 93.07                 | 96.42                    |
| SC3    | 42262684  | 6.38       | 97.58   | 94.01   | 42038368        | 6.33            | 99.46           | 99.22          | 92.46                 | 96.03                    |
| TC1    | 43059668  | 6.50       | 97.67   | 94.20   | 42845472        | 6.45            | 99.50           | 99.24          | 91.92                 | 95.41                    |
| TC2    | 45550060  | 6.88       | 97.71   | 94.26   | 45333066        | 6.83            | 99.52           | 99.24          | 92.66                 | 95.27                    |
| TC3    | 41427198  | 6.26       | 97.77   | 94.43   | 41258604        | 6.21            | 99.59           | 99.33          | 91.32                 | 95.50                    |
| Total  | 535190252 | 80.81      | -       | -       | 532524014       | 80.19           | -               | -              | 91.79                 | 95.14                    |

Note: Q20 (%): percentage of bases whose base recognition accuracy is more than 99%; Q30 (%): percentage of bases whose base recognition accuracy is more than 99.9%.
