# Supplementary material for: Transcriptome Analysis Reveals Molecular Mechanisms under Salt Stress in Leaves of Foxtail Millet (Setaria italica L.)
Source: MDPI journal article supplement (doi:10.3390/plants11141864), 2022-07-18
Supplement: s1 [file s1]

**Table S2.** Comprehensive evaluation of salt tolerance of 18 foxtail millet accessions in seeding foxtail millet under different NaCl concentrations. The score and rank under different NaCl concentrations indicate the scores and rank at that concentration, while the total score and rank indicate the comprehensive scores and rank under all NaCl concentrations.

| Code  | 0.13 mol L <sup>-1</sup> NaCl |                   |                   |                   |       |      | 0.17 mol L <sup>-1</sup> NaCl |                   |                   |                   |       |      | 0.22 mol L <sup>-1</sup> NaCl |                   |                   |                   |       |      | Total | Total |
|-------|-------------------------------|-------------------|-------------------|-------------------|-------|------|-------------------------------|-------------------|-------------------|-------------------|-------|------|-------------------------------|-------------------|-------------------|-------------------|-------|------|-------|-------|
|       | RB                            | RGR               | RCC               | RIO               | Score | Rank | RB                            | RGR               | RCC               | RIO               | Score | Rank | RB                            | RGR               | RCC               | RIO               | Score | Rank | score | rank  |
| FM73  | 86.39%<br>± 5.37%             | 83.33%<br>± 7.34% | 83.71%<br>± 4.38% | 89.37%<br>± 4.15% | 3.69  | 2    | 69.57%<br>± 6.01%             | 62.15%<br>± 5.72% | 58.58%<br>± 4.74% | 56.53%<br>± 2.92% | 2.95  | 3    | 38.41%<br>± 3.02%             | 30.00%<br>± 1.84% | 37.12%<br>± 2.42% | 41.74%<br>± 3.24% | 2.89  | 2    | 9.53  | 3     |
| FM96  | 92.94%<br>± 5.52%             | 88.76%<br>± 4.82% | 81.36%<br>± 4.54% | 88.88%<br>± 5.55% | 3.85  | 1    | 72.78%<br>± 6.07%             | 76.78%<br>± 5.54% | 64.39%<br>± 4.93% | 59.68%<br>± 5.41% | 3.41  | 1    | 38.43%<br>± 2.41%             | 37.64%<br>± 3.66% | 25.81%<br>± 1.97% | 42.25%<br>± 3.19% | 2.75  | 3    | 10.02 | 2     |
| FM31  | 83.30%<br>± 3.42%             | 82.71%<br>± 7.39% | 77.61%<br>± 3.43% | 83.34%<br>± 5.67% | 3.38  | 5    | 41.80%<br>± 3.43%             | 52.72%<br>± 4.09% | 47.73%<br>± 4.22% | 50.77%<br>± 2.91% | 2.11  | 5    | 37.55%<br>± 2.32%             | 36.26%<br>± 2.09% | 28.17%<br>± 1.69% | 34.96%<br>± 2.89% | 2.62  | 4    | 8.12  | 5     |
| FM6   | 87.69%<br>± 4.24%             | 93.33%<br>± 8.76% | 78.02%<br>± 6.61% | 81.35%<br>± 6.31% | 3.63  | 3    | 80.63%<br>± 5.01%             | 70.73%<br>± 4.58% | 52.74%<br>± 4.13% | 65.77%<br>± 3.97% | 3.31  | 2    | 41.98%<br>± 2.83%             | 37.49%<br>± 3.65% | 32.71%<br>± 1.31% | 50.59%<br>± 4.55% | 3.18  | 1    | 10.12 | 1     |
| FM7   | 82.35%<br>± 6.31%             | 80.44%<br>± 4.34% | 84.09%<br>± 3.78% | 86.15%<br>± 4.91% | 3.49  | 4    | 57.94%<br>± 4.78%             | 50.81%<br>± 2.61% | 70.11%<br>± 6.62% | 50.31%<br>± 4.94% | 2.74  | 4    | 38.01%<br>± 1.54%             | 30.13%<br>± 2.75% | 36.28%<br>± 1.72% | 25.43%<br>± 2.02% | 2.50  | 5    | 8.74  | 4     |
| FM102 | 41.86%<br>± 2.48%             | 56.84%<br>± 3.01% | 33.31%<br>± 1.57% | 52.08%<br>± 2.70% | 0.74  | 14   | 29.94%<br>± 2.21%             | 24.75%<br>± 1.36% | 25.50%<br>± 1.39% | 34.23%<br>± 2.67% | 0.67  | 8    | 6.56%<br>± 0.38%              | 5.89%<br>± 0.55%  | 10.23%<br>± 0.86% | 12.45%<br>± 0.62% | 0.45  | 14   | 1.87  | 12    |
| FM90  | 42.50%<br>± 2.54%             | 54.46%<br>± 3.34% | 22.67%<br>± 0.96% | 49.12%<br>± 3.93% | 0.47  | 18   | 23.39%<br>± 1.12%             | 22.59%<br>± 2.01% | 28.87%<br>± 2.25% | 24.86%<br>± 2.01% | 0.41  | 14   | 4.86%<br>± 0.28%              | 3.82%<br>± 0.25%  | 6.06%<br>± 0.44%  | 7.58%<br>± 0.54%  | 0.14  | 18   | 1.01  | 18    |
| FM89  | 57.82%<br>± 3.04%             | 64.71%<br>± 2.91% | 23.66%<br>± 1.40% | 47.34%<br>± 2.47% | 0.90  | 10   | 19.56%<br>± 1.51%             | 18.04%<br>± 1.52% | 24.76%<br>± 1.57% | 32.13%<br>± 2.12% | 0.38  | 16   | 15.68%<br>± 1.09%             | 15.27%<br>± 0.80% | 5.78%<br>± 0.31%  | 4.81%<br>± 0.41%  | 0.48  | 10   | 1.76  | 14    |
| FM86  | 63.34%<br>± 3.46%             | 60.00%<br>± 2.87% | 34.29%<br>± 2.92% | 47.72%<br>± 2.67% | 1.08  | 9    | 17.58%<br>± 1.36%             | 16.28%<br>± 0.94% | 30.61%<br>± 1.95% | 33.12%<br>± 2.52% | 0.48  | 12   | 5.41%<br>± 0.43%              | 4.92%<br>± 0.40%  | 12.64%<br>± 1.08% | 11.55%<br>± 0.74% | 0.48  | 13   | 2.03  | 9     |

|      |                   |                   |                   |                   |      |    |                   |                   |                   |                   |      |    |                   |                   |                   |                   |      |    |      |    |
|------|-------------------|-------------------|-------------------|-------------------|------|----|-------------------|-------------------|-------------------|-------------------|------|----|-------------------|-------------------|-------------------|-------------------|------|----|------|----|
| FM78 | 80.26%<br>± 3.52% | 78.44%<br>± 3.87% | 59.21%<br>± 2.87% | 46.39%<br>± 2.56% | 2.09 | 6  | 27.39%<br>± 1.47% | 25.34%<br>± 1.29% | 30.35%<br>± 2.05% | 34.67%<br>± 2.79% | 0.77 | 7  | 4.89%<br>± 0.41%  | 3.95%<br>± 0.33%  | 12.24%<br>± 1.03% | 10.89%<br>± 0.82% | 0.42 | 16 | 3.27 | 6  |
| FM72 | 39.32%<br>± 3.57% | 64.06%<br>± 3.27% | 28.35%<br>± 1.74% | 52.29%<br>± 3.60% | 0.77 | 12 | 17.60%<br>± 1.85% | 10.90%<br>± 0.97% | 28.25%<br>± 1.56% | 29.61%<br>± 1.98% | 0.26 | 18 | 2.21%<br>± 0.13%  | 1.97%<br>± 0.16%  | 15.07%<br>± 0.64% | 11.78%<br>± 1.01% | 0.45 | 17 | 1.48 | 15 |
| FM66 | 33.21%<br>± 1.86% | 56.46%<br>± 4.20% | 30.47%<br>± 1.76% | 52.68%<br>± 5.01% | 0.56 | 15 | 29.81%<br>± 2.48% | 11.57%<br>± 0.62% | 24.74%<br>± 2.27% | 31.81%<br>± 1.30% | 0.40 | 13 | 13.16%<br>± 1.31% | 12.46%<br>± 1.01% | 17.80%<br>± 1.34% | 13.29%<br>± 0.61% | 0.95 | 6  | 1.91 | 10 |
| FM62 | 63.12%<br>± 5.51% | 67.59%<br>± 6.50% | 28.98%<br>± 1.91% | 50.13%<br>± 2.16% | 1.19 | 8  | 38.24%<br>± 3.27% | 34.90%<br>± 2.10% | 23.12%<br>± 1.81% | 33.84%<br>± 3.03% | 0.86 | 6  | 5.41%<br>± 0.53%  | 4.34%<br>± 0.35%  | 18.79%<br>± 1.56% | 14.24%<br>± 0.90% | 0.71 | 9  | 2.77 | 8  |
| FM49 | 32.67%<br>± 2.15% | 64.80%<br>± 3.10% | 37.69%<br>± 2.93% | 50.74%<br>± 4.72% | 0.79 | 11 | 23.13%<br>± 2.26% | 21.74%<br>± 1.51% | 29.09%<br>± 2.73% | 29.01%<br>± 2.46% | 0.50 | 11 | 14.08%<br>± 1.05% | 11.37%<br>± 0.63% | 8.59%<br>± 0.41%  | 11.48%<br>± 0.57% | 0.60 | 8  | 1.88 | 11 |
| FM48 | 36.20%<br>± 2.02% | 64.08%<br>± 4.83% | 22.41%<br>± 0.97% | 48.33%<br>± 2.58% | 0.53 | 16 | 25.36%<br>± 2.41% | 10.87%<br>± 0.46% | 32.15%<br>± 2.39% | 35.22%<br>± 3.36% | 0.57 | 10 | 12.04%<br>± 1.10% | 11.37%<br>± 0.81% | 14.31%<br>± 1.01% | 7.14%<br>± 0.44%  | 0.67 | 7  | 1.77 | 13 |
| FM41 | 43.03%<br>± 3.60% | 42.86%<br>± 2.65% | 32.60%<br>± 2.56% | 53.43%<br>± 4.13% | 0.50 | 17 | 19.90%<br>± 1.85% | 16.78%<br>± 1.29% | 27.54%<br>± 1.28% | 31.34%<br>± 2.43% | 0.41 | 15 | 5.92%<br>± 0.58%  | 5.37%<br>± 0.38%  | 10.73%<br>± 0.78% | 10.79%<br>± 0.58% | 0.41 | 15 | 1.33 | 17 |
| FM27 | 80.11%<br>± 3.65% | 88.33%<br>± 6.48% | 22.13%<br>± 0.98% | 54.96%<br>± 5.17% | 1.89 | 7  | 29.29%<br>± 2.69% | 23.13%<br>± 1.86% | 34.57%<br>± 3.14% | 27.28%<br>± 1.68% | 0.66 | 9  | 6.40%<br>± 0.46%  | 5.02%<br>± 0.43%  | 12.15%<br>± 0.87% | 15.60%<br>± 0.88% | 0.56 | 11 | 3.11 | 7  |
| FM15 | 38.72%<br>± 1.85% | 63.04%<br>± 5.98% | 37.42%<br>± 2.41% | 47.16%<br>± 2.96% | 0.76 | 13 | 14.38%<br>± 2.18% | 15.47%<br>± 1.17% | 31.72%<br>± 2.80% | 25.92%<br>± 1.14% | 0.28 | 17 | 8.17%<br>± 0.39%  | 6.66%<br>± 0.29%  | 9.44%<br>± 0.51%  | 11.01%<br>± 1.09% | 0.43 | 12 | 1.48 | 16 |

Note: RB means the relative biomass; RGR means the relative growth rate; RCC means the relative chlorophyll content; RIR means the K<sup>+</sup>/Na<sup>+</sup> ratio.
