# Supplementary material for: Transcriptome Analysis Reveals Molecular Mechanisms under Salt Stress in Leaves of Foxtail Millet (Setaria italica L.)
Source: MDPI journal article supplement (doi:10.3390/plants11141864), 2022-07-18
Supplement: s1 [file s1]

**Table S1.** Salt tolerance identification of 104 foxtail millet accessions in germination stage under 0.13 mol L<sup>-1</sup>

| Code | Relative germination rate | Relative germination potential | Relative germination index | Relative plumule length | Relative root length | Score | Rank |
|------|---------------------------|--------------------------------|----------------------------|-------------------------|----------------------|-------|------|
| FM1  | 33.33%                    | 29.41%                         | 27.72%                     | 5.81%                   | 0.00%                | 1.45  | 72   |
| FM2  | 44.44%                    | 43.75%                         | 50.00%                     | 39.52%                  | 8.84%                | 2.85  | 23   |
| FM3  | 30.77%                    | 33.33%                         | 33.91%                     | 3.60%                   | 4.40%                | 1.61  | 68   |
| FM4  | 20.00%                    | 12.50%                         | 19.28%                     | 36.17%                  | 28.57%               | 1.84  | 61   |
| FM5  | 35.00%                    | 25.00%                         | 22.07%                     | 11.43%                  | 22.86%               | 1.80  | 63   |
| FM6  | 56.25%                    | 60.00%                         | 52.17%                     | 48.49%                  | 49.76%               | 4.12  | 4    |
| FM7  | 42.86%                    | 75.00%                         | 50.00%                     | 41.78%                  | 52.85%               | 4.03  | 5    |
| FM8  | 50.00%                    | 35.00%                         | 39.17%                     | 39.98%                  | 42.82%               | 3.23  | 12   |
| FM9  | 56.25%                    | 53.33%                         | 52.81%                     | 45.45%                  | 39.02%               | 3.81  | 7    |
| FM10 | 20.00%                    | 20.00%                         | 20.00%                     | 3.42%                   | 0.00%                | 0.95  | 85   |
| FM11 | 50.00%                    | 46.15%                         | 47.06%                     | 10.45%                  | 8.37%                | 2.46  | 38   |
| FM12 | 60.00%                    | 45.00%                         | 47.08%                     | 48.09%                  | 37.61%               | 3.68  | 8    |
| FM13 | 55.00%                    | 35.00%                         | 38.89%                     | 23.63%                  | 25.91%               | 2.75  | 27   |
| FM14 | 31.58%                    | 26.32%                         | 25.00%                     | 31.32%                  | 20.85%               | 2.08  | 53   |
| FM15 | 0.00%                     | 0.00%                          | 0.00%                      | 0.00%                   | 0.00%                | 0.00  | 92   |
| FM16 | 45.00%                    | 40.00%                         | 36.67%                     | 7.22%                   | 25.14%               | 2.37  | 41   |
| FM17 | 12.50%                    | 12.50%                         | 14.29%                     | 17.81%                  | 33.53%               | 1.44  | 73   |
| FM18 | 31.58%                    | 31.58%                         | 27.78%                     | 8.10%                   | 18.71%               | 1.81  | 62   |
| FM19 | 15.38%                    | 18.18%                         | 17.91%                     | 3.80%                   | 0.00%                | 0.83  | 87   |
| FM20 | 66.67%                    | 47.06%                         | 46.07%                     | 5.50%                   | 20.25%               | 2.83  | 24   |
| FM21 | 33.33%                    | 29.41%                         | 31.52%                     | 2.72%                   | 18.22%               | 1.78  | 64   |
| FM22 | 47.37%                    | 31.58%                         | 37.50%                     | 4.01%                   | 2.73%                | 1.87  | 58   |
| FM23 | 23.53%                    | 18.75%                         | 17.89%                     | 4.33%                   | 0.00%                | 0.97  | 84   |
| FM24 | 44.44%                    | 50.00%                         | 47.37%                     | 45.07%                  | 22.22%               | 3.20  | 13   |
| FM25 | 38.89%                    | 46.67%                         | 56.60%                     | 9.52%                   | 11.28%               | 2.50  | 36   |
| FM26 | 47.06%                    | 57.14%                         | 39.29%                     | 6.40%                   | 0.00%                | 2.23  | 46   |
| FM27 | 0.00%                     | 0.00%                          | 0.00%                      | 0.00%                   | 0.00%                | 0.00  | 93   |
| FM28 | 33.33%                    | 27.78%                         | 34.41%                     | 8.22%                   | 32.76%               | 2.14  | 51   |
| FM29 | 35.29%                    | 35.29%                         | 30.30%                     | 4.94%                   | 0.00%                | 1.58  | 70   |
| FM30 | 11.11%                    | 11.76%                         | 11.54%                     | 3.15%                   | 0.00%                | 0.57  | 91   |
| FM31 | 61.11%                    | 50.00%                         | 56.91%                     | 62.25%                  | 48.73%               | 4.33  | 3    |
| FM32 | 35.29%                    | 46.15%                         | 35.09%                     | 10.55%                  | 18.49%               | 2.21  | 47   |
| FM33 | 35.29%                    | 33.33%                         | 32.04%                     | 5.15%                   | 9.62%                | 1.76  | 65   |
| FM34 | 62.50%                    | 53.85%                         | 51.23%                     | 7.12%                   | 3.99%                | 2.69  | 29   |

|      |        |        |        |        |        |      |    |
|------|--------|--------|--------|--------|--------|------|----|
| FM35 | 38.89% | 35.29% | 40.00% | 15.09% | 32.78% | 2.52 | 34 |
| FM36 | 50.00% | 52.63% | 41.38% | 10.48% | 43.55% | 3.06 | 18 |
| FM37 | 43.75% | 41.67% | 38.46% | 11.94% | 8.84%  | 2.19 | 49 |
| FM38 | 65.00% | 65.00% | 50.00% | 5.53%  | 12.20% | 2.98 | 20 |
| FM39 | 17.65% | 17.65% | 20.00% | 4.22%  | 0.00%  | 0.90 | 86 |
| FM40 | 36.84% | 33.33% | 33.65% | 42.23% | 49.71% | 3.07 | 17 |
| FM41 | 0.00%  | 0.00%  | 0.00%  | 0.00%  | 0.00%  | 0.00 | 94 |
| FM42 | 46.15% | 46.15% | 44.00% | 52.50% | 10.18% | 3.03 | 19 |
| FM43 | 45.00% | 40.00% | 31.25% | 56.43% | 50.79% | 3.47 | 10 |
| FM44 | 35.00% | 21.05% | 27.27% | 7.65%  | 8.31%  | 1.52 | 71 |
| FM45 | 50.00% | 33.33% | 34.31% | 11.21% | 8.26%  | 2.08 | 52 |
| FM46 | 52.63% | 42.11% | 38.74% | 8.77%  | 15.15% | 2.40 | 40 |
| FM47 | 31.58% | 22.22% | 25.70% | 5.10%  | 5.89%  | 1.38 | 74 |
| FM48 | 0.00%  | 0.00%  | 0.00%  | 0.00%  | 0.00%  | 0.00 | 95 |
| FM49 | 0.00%  | 0.00%  | 0.00%  | 0.00%  | 0.00%  | 0.00 | 96 |
| FM50 | 15.79% | 10.53% | 12.28% | 5.37%  | 7.19%  | 0.79 | 89 |
| FM51 | 50.00% | 50.00% | 51.72% | 19.35% | 30.67% | 3.11 | 16 |
| FM52 | 45.00% | 35.00% | 35.83% | 28.75% | 16.82% | 2.47 | 37 |
| FM53 | 50.00% | 44.44% | 44.76% | 34.48% | 17.51% | 2.93 | 22 |
| FM54 | 15.00% | 12.50% | 14.29% | 4.62%  | 2.19%  | 0.74 | 90 |
| FM55 | 56.25% | 66.67% | 59.59% | 8.90%  | 30.78% | 3.40 | 11 |
| FM56 | 50.00% | 38.89% | 43.62% | 3.56%  | 43.26% | 2.80 | 25 |
| FM57 | 50.00% | 50.00% | 52.94% | 4.27%  | 17.22% | 2.67 | 30 |
| FM58 | 45.00% | 33.33% | 35.38% | 30.48% | 22.58% | 2.57 | 32 |
| FM59 | 66.67% | 44.44% | 48.15% | 14.29% | 18.63% | 2.94 | 21 |
| FM60 | 28.57% | 36.36% | 33.33% | 5.16%  | 2.70%  | 1.60 | 69 |
| FM61 | 50.00% | 46.67% | 47.83% | 12.79% | 24.59% | 2.79 | 26 |
| FM62 | 0.00%  | 0.00%  | 0.00%  | 0.00%  | 0.00%  | 0.00 | 97 |
| FM63 | 50.00% | 33.33% | 36.67% | 24.03% | 21.65% | 2.55 | 33 |
| FM64 | 38.89% | 27.78% | 31.02% | 35.67% | 16.42% | 2.31 | 43 |
| FM65 | 37.50% | 37.50% | 37.50% | 4.27%  | 4.88%  | 1.84 | 60 |
| FM66 | 0.00%  | 0.00%  | 0.00%  | 0.00%  | 0.00%  | 0.00 | 98 |
| FM67 | 28.57% | 27.27% | 28.99% | 4.20%  | 0.00%  | 1.34 | 76 |
| FM68 | 55.00% | 46.67% | 47.65% | 41.96% | 40.97% | 3.60 | 9  |
| FM69 | 42.11% | 41.18% | 42.72% | 41.18% | 35.81% | 3.15 | 14 |
| FM70 | 38.89% | 35.29% | 31.19% | 13.29% | 17.58% | 2.08 | 54 |
| FM71 | 47.06% | 53.85% | 51.16% | 53.91% | 44.93% | 3.88 | 6  |
| FM72 | 0.00%  | 0.00%  | 0.00%  | 0.00%  | 0.00%  | 0.00 | 99 |

|                          |        |        |        |        |        |       |     |
|--------------------------|--------|--------|--------|--------|--------|-------|-----|
| FM73                     | 63.16% | 58.82% | 58.29% | 65.00% | 40.40% | 4.40  | 1   |
| FM74                     | 15.38% | 25.00% | 21.24% | 3.13%  | 4.69%  | 1.05  | 82  |
| FM75                     | 25.00% | 30.00% | 44.35% | 28.57% | 11.11% | 2.15  | 50  |
| FM76                     | 50.00% | 37.50% | 30.93% | 6.06%  | 0.00%  | 1.86  | 59  |
| FM77                     | 35.29% | 28.57% | 26.51% | 40.45% | 15.04% | 2.24  | 45  |
| FM78                     | 0.00%  | 0.00%  | 0.00%  | 0.00%  | 0.00%  | 0.00  | 100 |
| FM79                     | 47.06% | 50.00% | 43.82% | 42.86% | 20.00% | 3.11  | 15  |
| FM80                     | 6.25%  | 7.14%  | 8.22%  | 41.04% | 12.00% | 1.16  | 81  |
| FM81                     | 25.00% | 20.00% | 12.86% | 14.84% | 16.63% | 1.37  | 75  |
| FM82                     | 26.32% | 22.22% | 21.63% | 9.04%  | 8.26%  | 1.34  | 77  |
| FM83                     | 21.05% | 25.00% | 21.99% | 33.63% | 46.15% | 2.33  | 42  |
| FM84                     | 25.00% | 30.00% | 28.13% | 2.05%  | 1.45%  | 1.30  | 78  |
| FM85                     | 30.00% | 25.00% | 26.67% | 8.06%  | 17.70% | 1.66  | 67  |
| FM86                     | 0.00%  | 0.00%  | 0.00%  | 0.00%  | 0.00%  | 0.00  | 101 |
| FM87                     | 20.00% | 21.05% | 18.10% | 36.36% | 44.52% | 2.21  | 48  |
| FM88                     | 30.00% | 30.00% | 25.00% | 41.67% | 28.57% | 2.40  | 39  |
| FM89                     | 0.00%  | 0.00%  | 0.00%  | 0.00%  | 0.00%  | 0.00  | 102 |
| FM90                     | 0.00%  | 0.00%  | 0.00%  | 0.00%  | 0.00%  | 0.00  | 103 |
| FM91                     | 15.79% | 11.11% | 8.21%  | 27.24% | 15.53% | 1.21  | 80  |
| FM92                     | 45.00% | 20.00% | 29.52% | 9.60%  | 8.95%  | 1.74  | 66  |
| FM93                     | 40.00% | 38.89% | 37.23% | 37.34% | 19.78% | 2.66  | 31  |
| FM94                     | 33.33% | 33.33% | 28.57% | 26.50% | 13.39% | 2.06  | 55  |
| FM95                     | 35.00% | 10.53% | 18.32% | 1.97%  | 1.72%  | 1.03  | 83  |
| FM96                     | 63.16% | 66.67% | 45.65% | 50.67% | 58.14% | 4.38  | 2   |
| FM97                     | 21.05% | 11.11% | 9.90%  | 5.26%  | 5.03%  | 0.80  | 88  |
| FM98                     | 43.75% | 20.00% | 26.32% | 12.70% | 26.67% | 2.02  | 57  |
| FM99                     | 44.44% | 40.00% | 35.08% | 36.95% | 20.67% | 2.71  | 28  |
| FM100                    | 31.58% | 11.11% | 21.05% | 6.84%  | 10.75% | 1.27  | 79  |
| FM101                    | 55.56% | 37.50% | 32.94% | 22.04% | 16.43% | 2.51  | 35  |
| FM102                    | 0.00%  | 0.00%  | 0.00%  | 0.00%  | 0.00%  | 0.00  | 104 |
| FM103                    | 40.00% | 30.00% | 18.86% | 28.41% | 15.76% | 2.02  | 56  |
| FM104                    | 47.37% | 44.44% | 30.23% | 19.23% | 7.84%  | 2.24  | 44  |
| Standard error           | 1.82   | 1.76   | 1.6    | 1.72   | 1.54   | 1.82  | -   |
| Mean value               | 34.36  | 30.65  | 29.72  | 18.12  | 16.89  | 34.36 | -   |
| Coefficient of variation | 53.93  | 58.42  | 55.01  | 96.67  | 92.88  | 53.93 | -   |
| Maximum                  | 66.67  | 75     | 59.59  | 65     | 58.14  | 66.67 | -   |
| Minimum                  | 0      | 0      | 0      | 0      | 0      | 0     | -   |

|        |       |       |      |      |       |       |   |
|--------|-------|-------|------|------|-------|-------|---|
| Median | 35.29 | 32.46 | 31.1 | 9.56 | 14.22 | 35.29 | - |
|--------|-------|-------|------|------|-------|-------|---|
