# Supplementary material for: Transcriptome Analysis Reveals Molecular Mechanisms under Salt Stress in Leaves of Foxtail Millet (Setaria italica L.)
Source: MDPI journal article supplement (doi:10.3390/plants11141864), 2022-07-18
Supplement: s1 [file s1]

**Table S3.** Enrichment analysis of KEGG between SS/SC and TS/TC

| Treatment | Pathway ID | Pathway annotation                                                              | Level1                         | Level2                                      | FDR                    | P-value                            |
|-----------|------------|---------------------------------------------------------------------------------|--------------------------------|---------------------------------------------|------------------------|------------------------------------|
| SS/SC     | sita00195  | Photosynthesis - <i>Setaria italica</i>                                         | Metabolism                     | Energy metabolism                           | $1.53 \times 10^{-19}$ | $1.38 \times 10^{-2}$ <sub>1</sub> |
|           | sita00710  | Carbon fixation in photosynthetic organisms - <i>Setaria italica</i>            | Metabolism                     | Energy metabolism                           | $3.04 \times 10^{-12}$ | $5.47 \times 10^{-1}$ <sub>4</sub> |
|           | sita00500  | Starch and sucrose metabolism - <i>Setaria italica</i>                          | Metabolism                     | Carbohydrate metabolism                     | $3.42 \times 10^{-8}$  | $9.23 \times 10^{-1}$ <sub>0</sub> |
|           | sita00906  | Carotenoid biosynthesis - <i>Setaria italica</i>                                | Metabolism                     | Metabolism of terpenoids and polyketides    | $1.76 \times 10^{-7}$  | $6.34 \times 10^{-9}$              |
|           | sita00630  | Glyoxylate and dicarboxylate metabolism - <i>Setaria italica</i>                | Metabolism                     | Carbohydrate metabolism                     | $2.38 \times 10^{-5}$  | $1.07 \times 10^{-6}$              |
|           | sita00250  | Alanine, aspartate and glutamate metabolism - <i>Setaria italica</i>            | Metabolism                     | Amino acid metabolism                       | $6.31 \times 10^{-5}$  | $3.41 \times 10^{-6}$              |
|           | sita00960  | Tropane, piperidine and pyridine alkaloid biosynthesis - <i>Setaria italica</i> | Metabolism                     | Biosynthesis of other secondary metabolites | $1.08 \times 10^{-4}$  | $6.78 \times 10^{-6}$              |
|           | sita00196  | Photosynthesis - antenna proteins - <i>Setaria italica</i>                      | Metabolism                     | Energy metabolism                           | $1.49 \times 10^{-4}$  | $1.07 \times 10^{-5}$              |
|           | sita00360  | Phenylalanine metabolism - <i>Setaria italica</i>                               | Metabolism                     | Amino acid metabolism                       | $5.64 \times 10^{-4}$  | $4.57 \times 10^{-5}$              |
|           | sita00010  | Glycolysis / Gluconeogenesis - <i>Setaria italica</i>                           | Metabolism                     | Carbohydrate metabolism                     | $6.72 \times 10^{-4}$  | $6.05 \times 10^{-5}$              |
|           | sita00860  | Porphyrin and chlorophyll metabolism - <i>Setaria italica</i>                   | Metabolism                     | Metabolism of cofactors and vitamins        | $8.04 \times 10^{-4}$  | $7.96 \times 10^{-5}$              |
|           | sita00970  | Aminoacyl-tRNA biosynthesis - <i>Setaria italica</i>                            | Genetic Information Processing | Translation                                 | $1.08 \times 10^{-3}$  | $1.17 \times 10^{-4}$              |
|           | sita00030  | Pentose phosphate pathway - <i>Setaria italica</i>                              | Metabolism                     | Carbohydrate metabolism                     | $1.73 \times 10^{-3}$  | $2.03 \times 10^{-4}$              |
|           | sita00051  | Fructose and mannose metabolism - <i>Setaria italica</i>                        | Metabolism                     | Carbohydrate metabolism                     | $2.10 \times 10^{-3}$  | $2.65 \times 10^{-4}$              |
|           | sita00620  | Pyruvate metabolism - <i>Setaria italica</i>                                    | Metabolism                     | Carbohydrate metabolism                     | $2.83 \times 10^{-3}$  | $3.88 \times 10^{-4}$              |
|           | sita00940  | Phenylpropanoid biosynthesis - <i>Setaria italica</i>                           | Metabolism                     | Biosynthesis of other secondary metabolites | $2.83 \times 10^{-3}$  | $4.07 \times 10^{-4}$              |
|           | sita00400  | Phenylalanine, tyrosine and tryptophan biosynthesis - <i>Setaria italica</i>    | Metabolism                     | Amino acid metabolism                       | $3.29 \times 10^{-3}$  | $5.03 \times 10^{-4}$              |
|           | sita00220  | Arginine biosynthesis - <i>Setaria italica</i>                                  | Metabolism                     | Amino acid metabolism                       | $4.36 \times 10^{-3}$  | $7.06 \times 10^{-4}$              |
|           | sita00260  | Glycine, serine and threonine metabolism - <i>Setaria italica</i>               | Metabolism                     | Amino acid metabolism                       | $4.54 \times 10^{-3}$  | $7.77 \times 10^{-4}$              |
|           | sita00480  | Glutathione metabolism - <i>Setaria italica</i>                                 | Metabolism                     | Metabolism of other amino acids             | $1.29 \times 10^{-2}$  | $2.32 \times 10^{-3}$              |
|           | sita00520  | Amino sugar and nucleotide sugar metabolism - <i>Setaria italica</i>            | Metabolism                     | Carbohydrate metabolism                     | $1.45 \times 10^{-2}$  | $2.74 \times 10^{-3}$              |
|           | sita00945  | Stilbenoid, diarylheptanoid and gingerol biosynthesis - <i>Setaria italica</i>  | Metabolism                     | Biosynthesis of other secondary metabolites | $1.65 \times 10^{-2}$  | $3.27 \times 10^{-3}$              |
|           | sita00564  | Glycerophospholipid metabolism - <i>Setaria italica</i>                         | Metabolism                     | Lipid metabolism                            | $1.79 \times 10^{-2}$  | $3.72 \times 10^{-3}$              |
|           | sita00950  | Isoquinoline alkaloid biosynthesis - <i>Setaria italica</i>                     | Metabolism                     | Biosynthesis of other secondary metabolites | $3.29 \times 10^{-2}$  | $7.11 \times 10^{-3}$              |
|           | sita00053  | Ascorbate and aldarate metabolism - <i>Setaria italica</i>                      | Metabolism                     | Carbohydrate metabolism                     | $3.43 \times 10^{-2}$  | $7.72 \times 10^{-3}$              |

|       |           |                                                                      |                                      |                                             |                       |                       |
|-------|-----------|----------------------------------------------------------------------|--------------------------------------|---------------------------------------------|-----------------------|-----------------------|
| TS/TC | sita00360 | Phenylalanine metabolism - <i>Setaria italica</i>                    | Metabolism                           | Amino acid metabolism                       | $4.68 \times 10^{-3}$ | $4.46 \times 10^{-5}$ |
|       | sita04016 | MAPK signaling pathway - plant - <i>Setaria italica</i>              | Environmental Information Processing | Signal transduction                         | $6.54 \times 10^{-3}$ | $1.50 \times 10^{-4}$ |
|       | sita00710 | Carbon fixation in photosynthetic organisms - <i>Setaria italica</i> | Metabolism                           | Energy metabolism                           | $6.54 \times 10^{-3}$ | $1.87 \times 10^{-4}$ |
|       | sita00330 | Arginine and proline metabolism - <i>Setaria italica</i>             | Metabolism                           | Amino acid metabolism                       | $1.78 \times 10^{-2}$ | $6.79 \times 10^{-4}$ |
|       | sita00250 | Alanine, aspartate and glutamate metabolism - <i>Setaria italica</i> | Metabolism                           | Amino acid metabolism                       | $1.94 \times 10^{-2}$ | $9.25 \times 10^{-4}$ |
|       | sita00270 | Cysteine and methionine metabolism - <i>Setaria italica</i>          | Metabolism                           | Amino acid metabolism                       | $4.52 \times 10^{-2}$ | $2.58 \times 10^{-3}$ |
|       | sita00950 | Isoquinoline alkaloid biosynthesis - <i>Setaria italica</i>          | Metabolism                           | Biosynthesis of other secondary metabolites | $7.74 \times 10^{-2}$ | $5.32 \times 10^{-3}$ |
|       | sita00901 | Indole alkaloid biosynthesis - <i>Setaria italica</i>                | Metabolism                           | Biosynthesis of other secondary metabolites | $7.74 \times 10^{-2}$ | $5.90 \times 10^{-3}$ |
|       | sita04075 | Plant hormone signal transduction - <i>Setaria italica</i>           | Environmental Information Processing | Signal transduction                         | $9.02 \times 10^{-2}$ | $7.73 \times 10^{-3}$ |
|       | sita00965 | Betalain biosynthesis - <i>Setaria italica</i>                       | Metabolism                           | Biosynthesis of other secondary metabolites | $1.03 \times 10^{-1}$ | $9.79 \times 10^{-3}$ |
