# Supplementary material for: Transcriptome Analysis Reveals Molecular Mechanisms under Salt Stress in Leaves of Foxtail Millet (Setaria italica L.)
Source: MDPI journal article supplement (doi:10.3390/plants11141864), 2022-07-18
Supplement: s1 [file s1]

**Table S4.** DGEs associated with photosynthesis under salt stress

| Pathway                                                  | Function       | Symbol | Name                                              | Gene id   | SS/SC                |       | TS/TC                |     |
|----------------------------------------------------------|----------------|--------|---------------------------------------------------|-----------|----------------------|-------|----------------------|-----|
|                                                          |                |        |                                                   |           | -Log <sub>10</sub> P | DEV   | -Log <sub>10</sub> P | DEV |
| Photosynthesis - <i>Setaria italica</i> (foxtail millet) | Photosystem I  | PsaD   | photosystem I subunit II                          | 101769456 | 7.60                 | -3.32 |                      |     |
| Photosynthesis - <i>Setaria italica</i> (foxtail millet) | Photosystem I  | PsaE   | photosystem I subunit IV                          | 101767783 | 3.05                 | -2.80 |                      |     |
| Photosynthesis - <i>Setaria italica</i> (foxtail millet) | Photosystem I  | PsaF   | photosystem I subunit III                         | 101783492 | 3.02                 | -3.12 |                      |     |
| Photosynthesis - <i>Setaria italica</i> (foxtail millet) | Photosystem I  | PsaG   | photosystem I subunit V                           | 101779542 | 6.55                 | -3.21 |                      |     |
| Photosynthesis - <i>Setaria italica</i> (foxtail millet) | Photosystem I  | PsaH   | photosystem I subunit VI                          | 101785215 | 3.69                 | -3.21 |                      |     |
| Photosynthesis - <i>Setaria italica</i> (foxtail millet) | Photosystem I  | PsaK   | photosystem I subunit X                           | 101755060 | 3.66                 | -3.11 |                      |     |
| Photosynthesis - <i>Setaria italica</i> (foxtail millet) | Photosystem I  | PsaL   | photosystem I subunit XI                          | 101786300 | 3.70                 | -2.95 |                      |     |
| Photosynthesis - <i>Setaria italica</i> (foxtail millet) | Photosystem I  | PsaN   | photosystem I subunit PsaN                        | 101759541 | 6.79                 | -2.79 |                      |     |
| Photosynthesis - <i>Setaria italica</i> (foxtail millet) | Photosystem I  | PsaO   | photosystem I subunit PsaO                        | 101771677 | 3.00                 | -4.26 |                      |     |
| Photosynthesis - <i>Setaria italica</i> (foxtail millet) | Photosystem II | PsbO   | photosystem II oxygen-evolving enhancer protein 1 | 101771243 | 3.00                 | -2.36 |                      |     |
| Photosynthesis - <i>Setaria italica</i> (foxtail millet) | Photosystem II | PsbP   | photosystem II oxygen-evolving enhancer protein 2 | 101777440 | 5.60                 | -2.68 |                      |     |
| Photosynthesis - <i>Setaria italica</i> (foxtail millet) | Photosystem II | PsbP   | photosystem II oxygen-evolving enhancer protein 2 | 101779739 | 4.01                 | -2.04 |                      |     |
| Photosynthesis - <i>Setaria italica</i> (foxtail millet) | Photosystem II | PsbQ   | photosystem II oxygen-evolving enhancer protein 3 | 101753687 | 4.93                 | -2.96 |                      |     |
| Photosynthesis - <i>Setaria italica</i> (foxtail millet) | Photosystem II | PsbQ   | photosystem II oxygen-evolving enhancer protein 3 | 101771660 | 3.97                 | -3.26 |                      |     |
| Photosynthesis - <i>Setaria italica</i> (foxtail millet) | Photosystem II | PsbR   | photosystem II 10kDa protein                      | 101766967 | 4.71                 | -2.23 |                      |     |
| Photosynthesis - <i>Setaria italica</i> (foxtail millet) | Photosystem II | PsbS   | photosystem II 22kDa protein                      | 101764210 | 2.71                 | -2.29 |                      |     |
| Photosynthesis - <i>Setaria italica</i> (foxtail millet) | Photosystem II | PsbW   | photosystem II PsbW protein                       | 101778150 | 6.45                 | -2.70 |                      |     |

|                                                                                       |                                    |        |                                                          |           |      |       |      |       |
|---------------------------------------------------------------------------------------|------------------------------------|--------|----------------------------------------------------------|-----------|------|-------|------|-------|
| Photosynthesis - <i>Setaria italica</i> (foxtail millet)                              | Photosystem II                     | PsbW   | photosystem II PsbW protein                              | 101774285 | 3.38 | -2.89 |      |       |
| Photosynthesis - <i>Setaria italica</i> (foxtail millet)                              | Photosystem II                     | PsbY   | photosystem II PsbY protein                              | 101775036 | 8.32 | -3.17 | 2.04 | -1.32 |
| Photosynthesis - <i>Setaria italica</i> (foxtail millet)                              | Photosystem II                     | Psb27  | photosystem II Psb27 protein                             | 101763379 | 2.00 | -2.53 |      |       |
| Photosynthesis - <i>Setaria italica</i> (foxtail millet)                              | Photosystem II                     | Psb28  | photosystem II 13kDa protein                             | 101784482 | 2.15 | -2.91 |      |       |
| Photosynthesis - <i>Setaria italica</i> (foxtail millet)                              | F-type ATPase                      | AtpF   | F-type H <sup>+</sup> -transporting ATPase subunit b     | 101770956 | 6.63 | -2.75 |      |       |
| Photosynthesis - <i>Setaria italica</i> (foxtail millet)                              | F-type ATPase                      | AtpH   | F-type H <sup>+</sup> -transporting ATPase subunit delta | 101774771 | 4.54 | -2.60 |      |       |
| Photosynthesis - <i>Setaria italica</i> (foxtail millet)                              | Photosynthethic electron transport | PetH   | ferredoxin--NADP <sup>+</sup> reductase [EC:1.18.1.2]    | 101763545 | 4.87 | -2.28 |      |       |
| Photosynthesis - <i>Setaria italica</i> (foxtail millet)                              | Photosynthethic electron transport | PetH   | ferredoxin--NADP <sup>+</sup> reductase [EC:1.18.1.2]    | 101769250 | 3.75 | -1.94 |      |       |
| Photosynthesis - <i>Setaria italica</i> (foxtail millet)                              | Photosynthethic electron transport | PetF   | ferredoxin                                               | 101752738 | 8.34 | -3.27 |      |       |
| Photosynthesis - <i>Setaria italica</i> (foxtail millet)                              | Photosynthethic electron transport | PetF   | ferredoxin                                               | 101756065 | 2.21 | -1.45 |      |       |
| Photosynthesis - <i>Setaria italica</i> (foxtail millet)                              | Photosynthethic electron transport | PetF   | ferredoxin                                               | 101785087 | 3.98 | -2.07 |      |       |
| Photosynthesis - <i>Setaria italica</i> (foxtail millet)                              | Photosynthethic electron transport | PetF   | ferredoxin                                               | 101786886 | 2.12 | -2.50 |      |       |
| Photosynthesis - <i>Setaria italica</i> (foxtail millet)                              | Photosynthethic electron transport | PetE   | plastocyanin                                             | 101755940 | 3.29 | -3.07 |      |       |
| Photosynthesis - <i>Setaria italica</i> (foxtail millet)                              | Cytochrome b6/f complex            | PetC   | cytochrome b6-f complex iron-sulfur subunit [EC:7.1.1.6] | 101778821 | 5.67 | -2.50 |      |       |
| Carbon fixation in photosynthetic organisms - <i>Setaria italica</i> (foxtail millet) | Calvin-Benson cycle                | ALDO   | fructose-bisphosphate aldolase, class I [EC:4.1.2.13]    | 101754815 | 5.32 | -2.39 |      |       |
| Carbon fixation in photosynthetic organisms - <i>Setaria italica</i> (foxtail millet) | Calvin-Benson cycle                | ALDO   | fructose-bisphosphate aldolase, class I [EC:4.1.2.13]    | 101768485 | 4.47 | -3.45 | 2.26 | -1.47 |
| Carbon fixation in photosynthetic organisms - <i>Setaria italica</i> (foxtail millet) | Calvin-Benson cycle                | ALDO   | fructose-bisphosphate aldolase, class I [EC:4.1.2.13]    | 101786189 | 4.50 | -2.16 | 2.05 | -1.26 |
| Carbon fixation in photosynthetic organisms - <i>Setaria italica</i> (foxtail millet) | Calvin-Benson cycle                | ALDO   | fructose-bisphosphate aldolase, class I [EC:4.1.2.13]    | 101771498 | 2.09 | 1.36  | 2.07 | 1.37  |
| Carbon fixation in photosynthetic organisms - <i>Setaria italica</i> (foxtail millet) | Calvin-Benson cycle                | FBPase | fructose-1,6-bisphosphatase I [EC:3.1.3.11]              | 101755852 | 3.94 | -2.01 |      |       |

|                                                                                       |                                         |               |                                                                                          |           |      |       |      |       |
|---------------------------------------------------------------------------------------|-----------------------------------------|---------------|------------------------------------------------------------------------------------------|-----------|------|-------|------|-------|
| Carbon fixation in photosynthetic organisms - <i>Setaria italica</i> (foxtail millet) | Calvin-Benson cycle                     | FBPase        | fructose-1,6-bisphosphatase I [EC:3.1.3.11]                                              | 101770545 | 6.94 | -2.83 |      |       |
| Carbon fixation in photosynthetic organisms - <i>Setaria italica</i> (foxtail millet) | Calvin-Benson cycle                     | Transketolase | transketolase                                                                            | 101762694 | 2.81 | -1.94 |      |       |
| Carbon fixation in photosynthetic organisms - <i>Setaria italica</i> (foxtail millet) | Calvin-Benson cycle                     | glpX-SEBP     | fructose-1,6-bisphosphatase II / sedoheptulose-1,7-bisphosphatase [EC:3.1.3.11 3.1.3.37] | 101753539 | 4.82 | -2.32 |      |       |
| Carbon fixation in photosynthetic organisms - <i>Setaria italica</i> (foxtail millet) | Calvin-Benson cycle                     | RPI           | ribose 5-phosphate isomerase A [EC:5.3.1.6]                                              | 101784778 | 4.90 | -3.32 |      |       |
| Carbon fixation in photosynthetic organisms - <i>Setaria italica</i> (foxtail millet) | Calvin-Benson cycle                     | TPI           | <u>triosephosphate isomerase (TIM)</u> [EC:5.3.1.1]                                      | 101773317 | 2.68 | -1.95 |      |       |
| Carbon fixation in photosynthetic organisms - <i>Setaria italica</i> (foxtail millet) | Calvin-Benson cycle                     | TPI           | <u>triosephosphate isomerase (TIM)</u> [EC:5.3.1.1]                                      | 101760718 |      |       | 3.58 | -2.11 |
| Carbon fixation in photosynthetic organisms - <i>Setaria italica</i> (foxtail millet) | Calvin-Benson cycle                     | GAPDH         | glyceraldehyde-3-phosphate dehydrogenase (NADP+) (phosphorylating) [EC:1.2.1.13]         | 101752582 | 2.90 | -2.82 |      |       |
| Carbon fixation in photosynthetic organisms - <i>Setaria italica</i> (foxtail millet) | Calvin-Benson cycle                     | GAPA          | glyceraldehyde-3-phosphate dehydrogenase (NADP+) (phosphorylating) [EC:1.2.1.13]         | 101774537 | 2.63 | -3.02 |      |       |
| Carbon fixation in photosynthetic organisms - <i>Setaria italica</i> (foxtail millet) | Calvin-Benson cycle                     | RPE           | ribulose-phosphate 3-epimerase                                                           | 101774062 | 5.31 | -2.40 |      |       |
| Carbon fixation in photosynthetic organisms - <i>Setaria italica</i> (foxtail millet) | Calvin-Benson cycle                     | PRK           | phosphoribulokinase [EC:2.7.1.19]                                                        | 101762778 | 3.02 | -1.72 |      |       |
| Carbon fixation in photosynthetic organisms - <i>Setaria italica</i> (foxtail millet) | Calvin-Benson cycle                     | PRK           | phosphoribulokinase [EC:2.7.1.19]                                                        | 101764636 | 4.53 | -3.07 |      |       |
| Carbon fixation in photosynthetic organisms - <i>Setaria italica</i> (foxtail millet) | Calvin-Benson cycle                     | Rubisco       | ribulose-bisphosphate carboxylase small chain [EC:4.1.1.39]                              | 101763632 | 5.28 | -2.38 |      |       |
| Carbon fixation in photosynthetic organisms - <i>Setaria italica</i> (foxtail millet) | Calvin-Benson cycle                     | Rubisco       | ribulose-bisphosphate carboxylase small chain [EC:4.1.1.39]                              | 101768770 | 2.10 | -1.36 |      |       |
| Carbon fixation in photosynthetic organisms - <i>Setaria italica</i> (foxtail millet) | Calvin-Benson cycle                     | PGK           | phosphoglycerate kinase [EC:2.7.2.3]                                                     | 101765234 | 2.72 | -2.86 |      |       |
| Carbon fixation in photosynthetic organisms - <i>Setaria italica</i> (foxtail millet) | C <sub>4</sub> -Dicarboxylic acid cycle | PEPC          | <u>phosphoenolpyruvate carboxylase</u> [EC:4.1.1.31]                                     | 101764206 | 4.92 | -3.17 |      |       |
| Carbon fixation in photosynthetic organisms - <i>Setaria italica</i> (foxtail millet) | C <sub>4</sub> -Dicarboxylic acid cycle | PPDK          | pyruvate, orthophosphate dikinase [EC:2.7.9.1]                                           | 101760933 | 2.86 | -1.64 |      |       |

|                                                                                       |                            |          |                                                                             |           |      |       |      |           |
|---------------------------------------------------------------------------------------|----------------------------|----------|-----------------------------------------------------------------------------|-----------|------|-------|------|-----------|
| Carbon fixation in photosynthetic organisms - <i>Setaria italica</i> (foxtail millet) | C4-Dicarboxylic acid cycle | MDH      | malate dehydrogenase (oxaloacetate-decarboxylating)(NADP+)<br>[EC:1.1.1.40] | 101757986 | 2.57 | 9.55  | 4.22 | 11.8<br>2 |
| Carbon fixation in photosynthetic organisms - <i>Setaria italica</i> (foxtail millet) | C4-Dicarboxylic acid cycle | MDH      | malate dehydrogenase (oxaloacetate-decarboxylating)(NADP+)<br>[EC:1.1.1.40] | 101777875 | 3.19 | -1.75 |      |           |
| Carbon fixation in photosynthetic organisms - <i>Setaria italica</i> (foxtail millet) | C4-Dicarboxylic acid cycle | MDH      | malate dehydrogenase (oxaloacetate-decarboxylating)(NADP+)<br>[EC:1.1.1.40] | 101782922 | 3.63 | 4.50  |      |           |
| Carbon fixation in photosynthetic organisms - <i>Setaria italica</i> (foxtail millet) | C4-Dicarboxylic acid cycle | MDH      | malate dehydrogenase [EC:1.1.1.37]                                          | 101771167 | 2.54 | -2.00 |      |           |
| Carbon fixation in photosynthetic organisms - <i>Setaria italica</i> (foxtail millet) | C4-Dicarboxylic acid cycle | MDH      | malate dehydrogenase [EC:1.1.1.37]                                          | 101771269 | 2.21 | 2.19  |      |           |
| Carbon fixation in photosynthetic organisms - <i>Setaria italica</i> (foxtail millet) | C4-Dicarboxylic acid cycle | MDH2     | malate dehydrogenase [EC:1.1.1.37]                                          | 101775144 | 4.48 | -2.14 |      |           |
| Carbon fixation in photosynthetic organisms - <i>Setaria italica</i> (foxtail millet) | C4-Dicarboxylic acid cycle | NADP-MDH | malate dehydrogenase (NADP+)<br>[EC:1.1.1.82]                               | 101775740 | 2.45 | -2.59 |      |           |
| Carbon fixation in photosynthetic organisms - <i>Setaria italica</i> (foxtail millet) | C4-Dicarboxylic acid cycle | NADP-MDH | malate dehydrogenase (NADP+)<br>[EC:1.1.1.82]                               | 101754520 | 2.72 | -1.57 |      |           |
| Carbon fixation in photosynthetic organisms - <i>Setaria italica</i> (foxtail millet) | C4-Dicarboxylic acid cycle | GGAT     | glutamate--glyoxylate aminotransferase<br>[EC:2.6.1.4 2.6.1.2 2.6.1.44]     | 101767913 | 2.46 | -1.49 |      |           |
