# Supplementary material for: Transcriptome Analysis Reveals Molecular Mechanisms under Salt Stress in Leaves of Foxtail Millet (Setaria italica L.)
Source: MDPI journal article supplement (doi:10.3390/plants11141864), 2022-07-18
Supplement: s1 [file s1]

**Table S5.** DEGs related to transcription factor under salt stress

| Treatment | Gene id   | Symbol   | Family   | Log <sub>10</sub> P   | log <sub>2</sub> FoldChange | GO                                                                     | KEGG   |
|-----------|-----------|----------|----------|-----------------------|-----------------------------|------------------------------------------------------------------------|--------|
| TS/TC     | 101761227 | AIL5     | AP2/ERF  | 7.99×10 <sup>-3</sup> | Inf                         | GO:0007275; GO:0006355; GO:0003677; GO:0003700; GO:0005634             | K09285 |
|           | 101773645 | ERF105   | AP2/ERF  | 1.28×10 <sup>-5</sup> | 2.48                        | GO:0006351                                                             | K09286 |
|           | 101777485 | ERF2     | AP2/ERF  | 9.60×10 <sup>-4</sup> | 2.56                        | GO:0006355; GO:0003700; GO:0003677; GO:0005634                         | K09286 |
|           | 101784800 | ERF094   | AP2/ERF  | 5.12×10 <sup>-4</sup> | 4.05                        | GO:0006351                                                             |        |
|           | 101785798 | bHLH48   | bHLH     | 5.46×10 <sup>-3</sup> | -2.36                       | GO:0046983; GO:0003677                                                 |        |
|           | 101755679 | UNE10    | bHLH     | 9.41×10 <sup>-4</sup> | 1.76                        | GO:0009506; GO:0046983; GO:0009567                                     |        |
|           | 101765898 | bHLH112  | bHLH     | 5.95×10 <sup>-3</sup> | 1.54                        | GO:0001228; GO:0045944; GO:0001046; GO:0046983; GO:0005634             |        |
|           | 101780831 | bHLH041  | bHLH     | 1.14×10 <sup>-3</sup> | 2.21                        | GO:0046983                                                             |        |
|           | 101753232 | HHO5     | GARP     | 5.51×10 <sup>-3</sup> | -2.19                       | GO:0006355; GO:0003677; GO:0005634                                     |        |
|           | 101759317 | Hsf C-2b | HSF      | 3.35×10 <sup>-4</sup> | -2.00                       | GO:0006355; GO:0043565; GO:0003700; GO:0005634                         | K09419 |
|           | 101770723 | Hsf C-2a | HSF      | 4.05×10 <sup>-4</sup> | -2.94                       | GO:0003677                                                             | K09419 |
|           | 101768861 | PHL11    | MYB-MYC  | 8.11×10 <sup>-3</sup> | -2.55                       | GO:0006355; GO:0003677; GO:0005634                                     |        |
|           | 101773024 | MYC2     | MYB-MYC  | 1.38×10 <sup>-4</sup> | -7.12                       | GO:0046983                                                             |        |
|           | 101774132 | NAC104   | NAC      | 3.03×10 <sup>-4</sup> | -3.42                       | GO:0048367; GO:0006355; GO:0003677; GO:0010089; GO:0043067; GO:0005634 |        |
|           | 101777848 | NAC72    | NAC      | 2.64×10 <sup>-3</sup> | -2.44                       | GO:0006355; GO:0003677; GO:0005634                                     |        |
|           | 101786033 | JUB 1    | NAC      | 6.38×10 <sup>-3</sup> | -3.04                       | GO:0006355; GO:0003677; GO:0005634                                     |        |
|           | 101785579 | NF-Y     | NF       | 6.06×10 <sup>-4</sup> | -Inf                        | GO:0005634; GO:0046982                                                 | K08065 |
|           | 101767348 | PCL1     | PCL      | 7.29×10 <sup>-3</sup> | -1.98                       | GO:0006355; GO:0003677; GO:0005634                                     |        |
|           | 101763706 | GTL1     | Trihelix | 5.59×10 <sup>-3</sup> | -1.91                       | GO:0003677                                                             |        |
|           | 101756467 | WRKY33   | WRKY     | 6.48×10 <sup>-3</sup> | 1.66                        | GO:0006355; GO:0043565; GO:0003700                                     |        |
|           | 101756513 | WRKY57   | WRKY     | 9.73×10 <sup>-4</sup> | 4.62                        | GO:0006355; GO:0043565; GO:0003700                                     |        |
|           | 101758356 | WRKY70   | WRKY     | 6.44×10 <sup>-3</sup> | 1.43                        | GO:0006355; GO:0043565; GO:0003700                                     |        |
|           | 101762911 | WRKY70   | WRKY     | 5.11×10 <sup>-3</sup> | 1.64                        | GO:0006355; GO:0043565; GO:0003700                                     |        |
|           | 101769236 | WRKY4    | WRKY     | 6.75×10 <sup>-3</sup> | 1.84                        | GO:0006355; GO:0043565; GO:0003700                                     |        |

|       |           |         |         |                       |       |                                                                                                            |        |
|-------|-----------|---------|---------|-----------------------|-------|------------------------------------------------------------------------------------------------------------|--------|
| SS/SC | 101769849 | WRKY50  | WRKY    | $8.00 \times 10^{-3}$ | 2.09  | GO:0006355; GO:0043565; GO:0003700                                                                         |        |
|       | 101775299 | WRKY53  | WRKY    | $8.74 \times 10^{-3}$ | 1.85  | GO:0006355; GO:0043565; GO:0003700                                                                         |        |
|       | 101776857 | WRKY26  | WRKY    | $1.33 \times 10^{-3}$ | 1.82  | GO:0006355; GO:0043565; GO:0003700                                                                         | K13424 |
|       | 101781477 | WRKY28  | WRKY    | $6.80 \times 10^{-4}$ | 3.35  | GO:0006355; GO:0043565; GO:0003700                                                                         |        |
|       | 101782717 | WRKY24  | WRKY    | $3.27 \times 10^{-3}$ | 1.74  | GO:0006355; GO:0043565; GO:0003700                                                                         | K13424 |
|       | 101771359 | ERF018  | AP2/ERF | $9.81 \times 10^{-3}$ | -Inf  | GO:0006355; GO:0003700; GO:0003677; GO:0005634                                                             |        |
|       | 101776627 | ERF034  | AP2/ERF | $3.48 \times 10^{-3}$ | -4.7  | GO:0006355; GO:0003700; GO:0003677; GO:0005634; GO:0009536                                                 | K09286 |
|       | 101777340 | ERF018  | AP2/ERF | $2.88 \times 10^{-3}$ | -4.77 | GO:0006355; GO:0003700; GO:0003677; GO:0005634                                                             |        |
|       | 101778978 | ERF105  | AP2/ERF | $9.67 \times 10^{-3}$ | -1.72 | GO:0006355; GO:0003700; GO:0003677; GO:0005634                                                             | K09286 |
|       | 101765739 | bHLH35  | bHLH    | $2.93 \times 10^{-3}$ | -2.44 | GO:0046983                                                                                                 |        |
|       | 101766425 | bHLH35  | bHLH    | $1.91 \times 10^{-7}$ | -3.1  | GO:0046983                                                                                                 |        |
|       | 101766960 | bHLH35  | bHLH    | $6.48 \times 10^{-6}$ | -2.83 | GO:0046983                                                                                                 |        |
|       | 101773457 | APG     | bHLH    | $4.13 \times 10^{-3}$ | -1.87 | GO:0031539; GO:0042802; GO:0003677; GO:0046983; GO:0009740; GO:0010017; GO:0005634; GO:0009704             | K12126 |
|       | 101781503 | bHLH30  | bHLH    | $1.64 \times 10^{-3}$ | -2.17 | GO:0046983; GO:0005634; GO:0003677                                                                         |        |
|       | 101757337 | bHLH128 | bHLH    | $3.90 \times 10^{-4}$ | 1.95  | GO:0001228; GO:0001046; GO:0046983; GO:0005634; GO:0006366                                                 |        |
|       | 101760887 | BHLH089 | bHLH    | $2.12 \times 10^{-5}$ | 2.27  | GO:0046983                                                                                                 |        |
|       | 101761750 | BHLH062 | bHLH    | $8.86 \times 10^{-3}$ | 1.4   | GO:0046983                                                                                                 |        |
|       | 101764187 | ILI3    | bHLH    | $9.51 \times 10^{-3}$ | 3.91  | GO:0046983                                                                                                 |        |
|       | 101767345 | bHLH112 | bHLH    | $8.06 \times 10^{-3}$ | 1.42  | GO:0046983                                                                                                 |        |
|       | 101768277 | bHLH68  | bHLH    | $5.24 \times 10^{-3}$ | 1.54  | GO:0046983                                                                                                 |        |
|       | 101775649 | PIF4    | bHLH    | $6.68 \times 10^{-3}$ | 1.42  | GO:0046983                                                                                                 |        |
|       | 101755679 | UNE10   | bHLH    | $6.21 \times 10^{-7}$ | 2.65  | GO:0009506; GO:0046983; GO:0009567                                                                         |        |
|       | 101756519 | HBP-1a  | bZIP    | $8.04 \times 10^{-3}$ | 1.67  | GO:0006355; GO:0043565; GO:0003700                                                                         | K09060 |
|       | 101760850 | HY5     | bZIP    | $2.24 \times 10^{-4}$ | 2.02  | GO:0006355; GO:0043565; GO:0003700                                                                         | K16241 |
|       | 101785019 | RL9     | GARP    | $2.08 \times 10^{-3}$ | 1.69  | GO:0009944; GO:0048481; GO:0044212; GO:0009887; GO:0006355; GO:0010051; GO:0010158; GO:0009956; GO:0005634 |        |

|           |                   |          |                       |       |                                                                                                                                                                              |        |
|-----------|-------------------|----------|-----------------------|-------|------------------------------------------------------------------------------------------------------------------------------------------------------------------------------|--------|
| 101752777 | GATA23            | GATA     | 4.72×10 <sup>-4</sup> | 1.87  | GO:0006366                                                                                                                                                                   |        |
| 101753493 | GATA18            | GATA     | 5.55×10 <sup>-3</sup> | 1.45  | GO:0001085; GO:0008270; GO:0001228; GO:0045944; GO:0005667; GO:0000977;<br>GO:0030154; GO:0003682; GO:0005634                                                                |        |
| 101759317 | HSF C-2b          | HSF      | 2.10×10 <sup>-7</sup> | -2.79 | GO:0006355; GO:0043565; GO:0003700; GO:0005634                                                                                                                               | K09419 |
| 101767343 | HSF C-1b          | HSF      | 2.49×10 <sup>-5</sup> | -2.60 | GO:0006355; GO:0043565; GO:0006970; GO:0003700; GO:0009737; GO:0005634                                                                                                       | K09419 |
| 101769419 | HSF B-2a-like     | HSF      | 3.22×10 <sup>-3</sup> | -2.32 | GO:0006355; GO:0043565; GO:0003700; GO:0005634                                                                                                                               | K09419 |
| 101770723 | HSF C-2a-like     | HSF      | 1.21×10 <sup>-9</sup> | -3.82 | GO:0003677                                                                                                                                                                   | K09419 |
| 101774980 | HSFA-2c           | HSF      | 8.40×10 <sup>-4</sup> | -1.84 | GO:0042802; GO:0006355; GO:0043565; GO:0003700; GO:0005634                                                                                                                   |        |
| 101763570 | MADS-Box51        | MADS-Box | 1.67×10 <sup>-3</sup> | 1.72  | GO:0006355; GO:0003677; GO:0046983; GO:0005634                                                                                                                               |        |
| 101773024 | MYC2              | MYB-MYC  | 9.67×10 <sup>-3</sup> | -5.11 | GO:0046983                                                                                                                                                                   |        |
| 101773784 | APL               | MYB-MYC  | 5.54×10 <sup>-3</sup> | -1.95 | GO:0006355; GO:0003677; GO:0005634                                                                                                                                           |        |
| 101770921 | RAX2              | MYB-MYC  | 4.54×10 <sup>-3</sup> | -1.60 | GO:0003677                                                                                                                                                                   | K09422 |
| 101755975 | DIVARICATA        | MYB-MYC  | 4.83×10 <sup>-3</sup> | 1.50  | GO:0006355; GO:0003677; GO:0005634                                                                                                                                           |        |
| 101770038 | MYBS3             | MYB-MYC  | 5.87×10 <sup>-3</sup> | 1.76  | GO:0008270; GO:0004402; GO:0006357; GO:0003713; GO:0003677; GO:0006338;<br>GO:0003682; GO:0035066; GO:0005634;                                                               |        |
| 101771187 | SRM1              | MYB-MYC  | 1.44×10 <sup>-5</sup> | 2.54  | GO:0006355; GO:0003677; GO:0005634                                                                                                                                           |        |
| 101774132 | NAC104            | NAC      | 5.61×10 <sup>-4</sup> | -3.98 | GO:0048367; GO:0006355; GO:0003677; GO:0010089; GO:0043067; GO:0005634                                                                                                       |        |
| 101767581 | NF-Y subunit A-4  | NF       | 2.19×10 <sup>-3</sup> | -1.77 | GO:0006355; GO:0003677; GO:0016602; GO:0003700                                                                                                                               | K08064 |
| 101770060 | NF-Y subunit B-11 | NF       | 5.06×10 <sup>-3</sup> | 1.64  | GO:0006355; GO:0043565; GO:0005634; GO:0046982                                                                                                                               | K08065 |
| 101760005 | NF-Y subunit C-2  | NF       | 6.33×10 <sup>-5</sup> | 2.58  | GO:0005634; GO:0046982                                                                                                                                                       |        |
| 101762971 | NF-Y subunit B-8  | NF       | 5.97×10 <sup>-3</sup> | 2.81  | GO:0006355; GO:0043565; GO:0005634; GO:0046982                                                                                                                               | K08065 |
| 101771780 | PCF7              | TCP      | 1.19×10 <sup>-3</sup> | -2.15 | GO:0016020                                                                                                                                                                   |        |
| 101771904 | TGAL1             | TGA      | 1.65×10 <sup>-3</sup> | -2.77 | GO:0018105; GO:0046777; GO:0035556; GO:0005516; GO:0005509; GO:0009931;<br>GO:0006355; GO:0009738; GO:0043565; GO:0005524; GO:0005737; GO:0003700;<br>GO:0004683; GO:0005634 | K14431 |
| 101756052 | WRKY63            | WRKY     | 3.05×10 <sup>-3</sup> | -Inf  | GO:0006355; GO:0043565; GO:0003700                                                                                                                                           |        |
| 101757145 | WRKY57            | WRKY     | 1.75×10 <sup>-3</sup> | -1.93 | GO:0006355; GO:0043565; GO:0003700                                                                                                                                           |        |
| 101765520 | WRKY14            | WRKY     | 7.86×10 <sup>-3</sup> | -3.58 | GO:0006355; GO:0043565; GO:0003700                                                                                                                                           |        |

---

|           |        |      |                       |       |                                    |
|-----------|--------|------|-----------------------|-------|------------------------------------|
| 101769639 | WRKY38 | WRKY | $1.43 \times 10^{-3}$ | -4.20 | GO:0006355; GO:0043565; GO:0003700 |
| 101772113 | WRKY70 | WRKY | $5.75 \times 10^{-3}$ | -Inf  | GO:0006355; GO:0043565; GO:0003700 |
| 101774144 | WRKY58 | WRKY | $3.38 \times 10^{-3}$ | -5.48 | GO:0006355; GO:0043565; GO:0003700 |
| 101756467 | WRKY33 | WRKY | $8.46 \times 10^{-4}$ | 1.83  | GO:0006355; GO:0043565; GO:0003700 |

---
