# Supplementary material for: Transcriptome Analysis Reveals Molecular Mechanisms under Salt Stress in Leaves of Foxtail Millet (Setaria italica L.)
Source: Plants (Basel). 2022 Jul 18;11(14):1864. doi: 10.3390/plants11141864 (PMC9323065; doi:10.3390/plants11141864)
Supplement: Supplementary file 1 [file plants-11-01864-s001.zip]

Archive with 7 entries (7 files):
- plants-1777431-Table S1.pdf
- plants-1777431-Table S2.pdf
- plants-1777431-Table S3.pdf
- plants-1777431-Table S4.pdf
- plants-1777431-Table S5.pdf
- plants-1777431-Table S6.pdf
- plants-1777431-Table S7.pdf
